# Supplementary material for: On the dissolution of lithium sulfate in water: anion photoelectron spectroscopy and density functional theory calculations
Source: Royal Society of Chemistry journal article supplement (doi:10.1039/c4cp05698a), 2015-01-01
Supplement: c4cp05698a1.pdf [file c4cp05698a1.pdf]

## Supporting Information

# **On the dissolution of Lithium sulfate in water: anion photoelectron spectroscopy and density functional theory calculations**

Gang Feng, Gao-Lei Hou, Hong-Guang Xu, Zhen Zeng, Wei-Jun Zheng\*

*Beijing National Laboratory for Molecular Sciences, State Key Laboratory of Molecular Reaction  
Dynamics, Institute of Chemistry, Chinese Academy of Sciences, Beijing 100190, China*

\* Corresponding author. E-mail: zhengwj@iccas.ac.cn

## **Content:**

- 1) Completion of one Reference [59]
- 2) Table with VDEs of  $\text{Li}_2\text{SO}_4(\text{H}_2\text{O})^-$  with different functionals.
- 3) Table with experimental VDEs and ADEs (eV) of  $\text{Li}_2\text{SO}_4(\text{H}_2\text{O})_n^-$  ( $n = 0-5$ ) clusters.
- 4) Figure S1: The mass spectrum of  $\text{Li}_2\text{SO}_4(\text{H}_2\text{O})_n^-$  ( $n = 0-5$ ) cluster anions.
- 5) Figure S2: Structures of most stable isomers belong to turtle-shaped and propeller-shaped viewed from different angles.
- 6) Figure S3: Natural bond orbital (NBO) Charge Distributions of the most stable isomers of  $\text{Li}_2\text{SO}_4(\text{H}_2\text{O})_n^-$  ( $n = 0-5$ ) and their corresponding neutrals.
- 7) Tables with LC- $\omega$ PBE/6-311++G(d,p) optimized geometries

1) Gaussian 09, Revision A.01, M. J. Frisch, G. W. Trucks, H. B. Schlegel, G. E. Scuseria, M. A. Robb, J. R. Cheeseman, G. Scalmani, V. Barone, B. Mennucci, G. A. Petersson, H. Nakatsuji, M. Caricato, X. Li, H. P. Hratchian, A. F. Izmaylov, J. Bloino, G. Zheng, J. L. Sonnenberg, M. Hada, M. Ehara, K. Toyota, R. Fukuda, J. Hasegawa, M. Ishida, T. Nakajima, Y. Honda, O. Kitao, H. Nakai, T. Vreven, J. A. Montgomery, Jr., J. E. Peralta, F. Ogliaro, M. Bearpark, J. J. Heyd, E. Brothers, K. N. Kudin, V. N. Staroverov, R. Kobayashi, J. Normand, K. Raghavachari, A. Rendell, J. C. Burant, S. S. Iyengar, J. Tomasi, M. Cossi, N. Rega, J. M. Millam, M. Klene, J. E. Knox, J. B. Cross, V. Bakken, C. Adamo, J. Jaramillo, R. Gomperts, R. E. Stratmann, O. Yazyev, A. J. Austin, R. Cammi, C. Pomelli, J. W. Ochterski, R. L. Martin, K. Morokuma, V. G. Zakrzewski, G. A. Voth, P. Salvador, J. J. Dannenberg, S. Dapprich, A. D. Daniels, O. Farkas, J. B. Foresman, J. V. Ortiz, J. Cioslowski, and D. J. Fox, Gaussian, Inc., Wallingford CT, 2009.

**Table S1. Comparison of the VDEs of  $\text{Li}_2\text{SO}_4(\text{H}_2\text{O})^-$  with different functionals and to that of experimental VDEs. All values are given in eV.**

| Isomers | Exp.VDE | LC- $\omega$ PBE |      | M06-2X     |      | B3LYP      |      | $\omega$ B97XD |      |
|---------|---------|------------------|------|------------|------|------------|------|----------------|------|
|         |         | $\Delta E$       | VDE  | $\Delta E$ | VDE  | $\Delta E$ | VDE  | $\Delta E$     | VDE  |
| 1a      | 1.03    | 0.00             | 0.94 | 0.00       | 0.98 | 0.00       | 1.24 | 0              | 0.97 |
| 1b      |         | 0.003            | 1.09 | 0.1        | 1.02 | 0.02       | 1.13 | 0.06           | 1.00 |
| 1c      |         | 0.10             | 1.22 | 0.26       | 1.01 | 0.23       | 1.08 | 0.14           | 1.02 |
| 1d      |         | 0.14             | 0.77 | 0.28       | 0.53 | 0.27       | 0.72 | 0.16           | 0.64 |
| 1e      | 0.32    | 0.20             | 0.38 | 0.36       | 0.16 | 0.36       | 0.40 | 0.22           | 0.32 |

**Table S2. Experimental VDEs and ADEs (eV) of  $\text{Li}_2\text{SO}_4(\text{H}_2\text{O})_n^-$  ( $n = 0-5$ ) clusters.**

| Cluster                                          | X'   |      | X    |      |
|--------------------------------------------------|------|------|------|------|
|                                                  | VDE  | ADE  | VDE  | ADE  |
| $\text{Li}_2\text{SO}_4^-$                       | 0.24 | 0.13 | 0.75 | 0.49 |
| $\text{Li}_2\text{SO}_4(\text{H}_2\text{O})^-$   | 0.32 | 0.24 | 1.03 | 0.84 |
| $\text{Li}_2\text{SO}_4(\text{H}_2\text{O})_2^-$ | 0.37 | 0.27 | 1.07 | 0.80 |
| $\text{Li}_2\text{SO}_4(\text{H}_2\text{O})_3^-$ | 0.54 | 0.28 | 0.92 | 0.69 |
| $\text{Li}_2\text{SO}_4(\text{H}_2\text{O})_4^-$ | -    | -    | 0.91 | 0.56 |
| $\text{Li}_2\text{SO}_4(\text{H}_2\text{O})_5^-$ | -    | -    | 0.94 | 0.58 |



**Figure S1** The mass spectrum of  $\text{Li}_2\text{SO}_4(\text{H}_2\text{O})_n^-$  ( $n = 1-5$ ) cluster anions. Although the mass signal  $\text{Li}_2\text{SO}_4^-$  is low as showed in this spectrum, we could increase its intensity by optimizing the experimental condition and take the photoelectron spectrum with confident.



Figure S2: The propeller-shaped and turtle-shaped Structures of  $\text{Li}_2\text{SO}_4$  and the tent-shaped structures of  $\text{Li}_2\text{SO}_4(\text{H}_2\text{O})_4$  viewed from different angles.

| anion                                                                               |                                                                                     | neutral                                                                              |                                                                                       |
|-------------------------------------------------------------------------------------|-------------------------------------------------------------------------------------|--------------------------------------------------------------------------------------|---------------------------------------------------------------------------------------|
| Turtle-shaped                                                                       | Propeller-shaped                                                                    | Turtle-shaped                                                                        | Propeller-shaped                                                                      |
|    |    |    |    |
| 0a                                                                                  | 0b                                                                                  | 0a'                                                                                  | 0b'                                                                                   |
|    |    |    |    |
| 1a                                                                                  | 1e                                                                                  | 1a'                                                                                  | 1c'                                                                                   |
|   |   |   |   |
| 2a                                                                                  | 2e                                                                                  | 2a'                                                                                  | 2b'                                                                                   |
|  |  |  |  |
| 3a                                                                                  | 3e                                                                                  | 3a'                                                                                  | 3d'                                                                                   |
|  |  |  |                                                                                       |
| 4a                                                                                  | 4f                                                                                  | 4a'                                                                                  |                                                                                       |
|  |  |  |                                                                                       |
| 5a                                                                                  | 5d                                                                                  | 5a'                                                                                  |                                                                                       |

**Figure S3** Natural bond orbital (NBO) Charge Distributions of the most stable isomers of  $\text{Li}_2\text{SO}_4(\text{H}_2\text{O})_n^-$  ( $n = 0-5$ ) and their corresponding neutrals.

4) **Table S3.** Cartesian coordinates for stable isomers of  $\text{Li}_2\text{SO}_4(\text{H}_2\text{O})_n^-$  ( $n = 0-5$ ) clusters

| $\text{Li}_2\text{SO}_4^-$                     |           |           |           |           |           |           |           |  |
|------------------------------------------------|-----------|-----------|-----------|-----------|-----------|-----------|-----------|--|
| <b>0a</b>                                      |           |           |           | <b>0b</b> |           |           |           |  |
|                                                | X         | Y         | Z         |           | X         | Y         | Z         |  |
| S                                              | 0.311115  | -0.000065 | -0.016388 | S         | -0.000013 | 0.000086  | -0.000006 |  |
| O                                              | 0.037992  | 1.239767  | -0.822600 | O         | -0.919912 | 0.944827  | -0.714044 |  |
| O                                              | -0.874983 | 0.000158  | 0.995982  | O         | -0.919746 | -0.944741 | 0.714060  |  |
| O                                              | 1.604416  | 0.000207  | 0.635297  | O         | 0.919942  | 0.713894  | 0.944839  |  |
| O                                              | 0.038113  | -1.240237 | -0.822040 | O         | 0.919743  | -0.714298 | -0.944612 |  |
| Li                                             | -1.626791 | 1.447775  | 0.052573  | Li        | -2.370395 | -0.000057 | -0.000024 |  |
| Li                                             | -1.627413 | -1.447241 | 0.052566  | Li        | 2.370394  | 0.000390  | -0.000505 |  |
| $\text{Li}_2\text{SO}_4(\text{H}_2\text{O})^-$ |           |           |           |           |           |           |           |  |
| <b>1a</b>                                      |           |           |           | <b>1b</b> |           |           |           |  |
|                                                | X         | Y         | Z         |           | X         | Y         | Z         |  |
| S                                              | -0.760892 | 0.000012  | 0.042880  | S         | -0.808495 | 0.090892  | -0.033177 |  |
| O                                              | -0.293147 | 1.233805  | 0.770434  | O         | -0.882348 | -1.140850 | -0.888786 |  |
| O                                              | 0.136425  | -0.000127 | -1.226071 | O         | 0.206513  | -0.327042 | 1.070133  |  |
| O                                              | -2.175496 | -0.000199 | -0.263398 | O         | -2.087404 | 0.501000  | 0.513062  |  |
| O                                              | -0.292906 | -1.233519 | 0.770721  | O         | -0.080144 | 1.201230  | -0.743899 |  |
| Li                                             | 1.206488  | 1.331204  | -0.370680 | Li        | 0.481803  | -1.980230 | 0.141901  |  |
| Li                                             | 1.206582  | -1.331197 | -0.370548 | Li        | 1.445596  | 0.878242  | 0.312374  |  |
| O                                              | 2.678710  | 0.000004  | 0.144514  | O         | 3.196855  | 0.120546  | -0.047142 |  |
| H                                              | 2.982334  | 0.000056  | 1.068776  | H         | 3.257002  | -0.747928 | 0.397219  |  |
| H                                              | 3.506945  | 0.000063  | -0.382864 | H         | 3.364036  | -0.096271 | -0.973555 |  |
| <b>1c</b>                                      |           |           |           | <b>1d</b> |           |           |           |  |
|                                                | X         | Y         | Z         |           | X         | Y         | Z         |  |
| S                                              | -0.681581 | -0.195502 | -0.006206 | S         | -0.544236 | 0.290269  | -0.018160 |  |
| O                                              | 0.338866  | -1.143396 | 0.528577  | O         | -1.842523 | -0.167830 | -0.593916 |  |
| O                                              | -1.691329 | -0.846510 | -0.820021 | O         | -0.122257 | -0.897249 | 0.887436  |  |
| O                                              | 0.094539  | 0.871164  | -0.834922 | O         | -0.611187 | 1.542889  | 0.711861  |  |
| O                                              | -1.261826 | 0.649885  | 1.098146  | O         | 0.544327  | 0.302923  | -1.071084 |  |
| Li                                             | -0.453416 | 2.195629  | 0.418178  | Li        | -1.618426 | -1.905723 | 0.220864  |  |
| Li                                             | 1.883299  | 1.185716  | -0.819905 | Li        | 1.362629  | -1.284560 | -0.200037 |  |
| O                                              | 2.717040  | -0.294092 | 0.047021  | O         | 2.905503  | -0.016122 | 0.058417  |  |
| H                                              | 1.846138  | -0.748578 | 0.284674  | H         | 2.938439  | 0.330103  | 0.953499  |  |
| H                                              | 3.191195  | -0.163830 | 0.869391  | H         | 2.238719  | 0.535781  | -0.406768 |  |
| <b>1e</b>                                      |           |           |           |           |           |           |           |  |
|                                                | X         | Y         | Z         |           | X         | Y         | Z         |  |
| S                                              | -0.469717 | 0.210992  | 0.005899  |           |           |           |           |  |
| O                                              | 0.154065  | 0.901975  | -1.168454 |           |           |           |           |  |
| O                                              | 0.216848  | 0.803264  | 1.199175  |           |           |           |           |  |
| O                                              | -0.133925 | -1.272899 | -0.072392 |           |           |           |           |  |
| O                                              | -1.945301 | 0.271380  | 0.050948  |           |           |           |           |  |
| Li                                             | 1.690966  | 1.088688  | -0.034061 |           |           |           |           |  |
| Li                                             | -2.024945 | -1.718068 | -0.015347 |           |           |           |           |  |

|   |          |           |           |
|---|----------|-----------|-----------|
| O | 2.512787 | -0.710097 | -0.039161 |
| H | 1.634865 | -1.155271 | -0.169303 |
| H | 2.823802 | -1.055528 | 0.800387  |



|    | <b>2a</b> |           |           |
|----|-----------|-----------|-----------|
|    | X         | Y         | Z         |
| S  | -1.155399 | -0.000076 | 0.031803  |
| O  | -0.850340 | 1.239891  | 0.825194  |
| O  | -0.032747 | -0.000105 | -1.046997 |
| O  | -2.482661 | -0.000392 | -0.552588 |
| O  | -0.849965 | -1.239661 | 0.825652  |
| Li | 0.697007  | 1.547080  | -0.221121 |
| Li | 0.697433  | -1.546898 | -0.220539 |
| O  | 2.570733  | -1.945679 | 0.014247  |
| H  | 2.943532  | -1.908883 | 0.905454  |
| H  | 3.188149  | -1.398226 | -0.507643 |
| O  | 2.570209  | 1.945998  | 0.014495  |
| H  | 2.942586  | 1.908293  | 0.905844  |
| H  | 3.187921  | 1.399145  | -0.507660 |

|    | <b>2c</b> |           |           |
|----|-----------|-----------|-----------|
|    | X         | Y         | Z         |
| S  | 1.045614  | -0.057699 | 0.003675  |
| O  | 0.848695  | 1.327658  | 0.525221  |
| O  | 2.322755  | -0.239707 | -0.658357 |
| O  | -0.134725 | -0.340950 | -0.965449 |
| O  | 0.792141  | -1.072721 | 1.094054  |
| Li | -0.731352 | -1.708709 | 0.238900  |
| Li | -1.788219 | 0.451771  | -0.817553 |
| O  | -1.554110 | 2.089198  | 0.102495  |
| H  | -0.579780 | 1.921999  | 0.329827  |
| H  | -1.989041 | 2.382654  | 0.903088  |
| O  | -2.687220 | -1.192408 | 0.052548  |
| H  | -3.261548 | -1.055852 | 0.833036  |
| H  | -3.254344 | -1.731435 | -0.542967 |

|    | <b>2e</b> |           |           |
|----|-----------|-----------|-----------|
|    | X         | Y         | Z         |
| S  | -0.303912 | -0.572816 | 0.008205  |
| O  | -1.185655 | -0.822257 | -1.175181 |
| O  | -1.207182 | -0.703282 | 1.194160  |
| O  | 0.213806  | 0.859353  | -0.067291 |
| O  | 0.907567  | -1.420684 | 0.064292  |
| Li | -2.609748 | -0.186225 | -0.053799 |
| Li | 2.023089  | 0.184111  | -0.013556 |
| O  | -2.357083 | 1.775362  | -0.073897 |
| H  | -2.461269 | 2.256676  | 0.749663  |

|    | <b>2b</b> |           |           |
|----|-----------|-----------|-----------|
|    | X         | Y         | Z         |
| S  | 0.936066  | -0.000013 | -0.124377 |
| O  | 0.082142  | -0.000335 | -1.355518 |
| O  | 0.504746  | 1.189787  | 0.737275  |
| O  | 2.353961  | -0.000135 | -0.412307 |
| O  | 0.504700  | -1.189207 | 0.738072  |
| Li | -1.727449 | -0.000022 | -0.996373 |
| Li | -0.084060 | 0.000584  | 2.134423  |
| O  | -2.033573 | 1.662846  | -0.043262 |
| H  | -2.526801 | 1.648668  | 0.784895  |
| H  | -1.086319 | 1.748993  | 0.231879  |
| O  | -2.033152 | -1.663097 | -0.042997 |
| H  | -1.085990 | -1.748741 | 0.232462  |
| H  | -2.527088 | -1.650170 | 0.784735  |

|    | <b>2d</b> |           |           |
|----|-----------|-----------|-----------|
|    | X         | Y         | Z         |
| S  | -0.908270 | 0.050539  | -0.047480 |
| O  | -1.205543 | -1.358076 | -0.466728 |
| O  | 0.036495  | -0.134312 | 1.162925  |
| O  | -2.078498 | 0.844562  | 0.269538  |
| O  | -0.013932 | 0.710076  | -1.076288 |
| Li | 0.192579  | -1.996144 | 0.659433  |
| Li | 1.577872  | 0.262652  | 0.058830  |
| O  | 2.067518  | -1.710718 | -0.169669 |
| H  | 2.152160  | -2.115171 | -1.049797 |
| H  | 2.729573  | -2.185861 | 0.378010  |
| O  | 1.773780  | 2.281944  | 0.074731  |
| H  | 1.428162  | 2.589692  | 0.916500  |
| H  | 0.976674  | 2.122090  | -0.477362 |

|   |           |          |           |
|---|-----------|----------|-----------|
| H | -1.376552 | 1.699580 | -0.188988 |
| O | 3.836043  | 0.736275 | -0.004916 |
| H | 4.622646  | 0.175640 | 0.053777  |
| H | 4.177794  | 1.641367 | -0.040998 |



| <b>3a</b> |           |           |           | <b>3b</b> |           |           |           |
|-----------|-----------|-----------|-----------|-----------|-----------|-----------|-----------|
|           | X         | Y         | Z         |           | X         | Y         | Z         |
| S         | -1.145041 | 0.316121  | 0.004377  | S         | -0.005456 | -0.789986 | -0.244184 |
| O         | -0.227186 | 0.807422  | 1.127710  | O         | -0.813830 | -0.472226 | -1.448984 |
| O         | -0.286447 | 0.564939  | -1.241587 | O         | -0.777475 | -1.610408 | 0.715372  |
| O         | -2.404193 | 1.027746  | -0.037358 | O         | 0.334988  | 0.555418  | 0.443966  |
| O         | -1.302922 | -1.163246 | 0.157410  | O         | 1.324142  | -1.364829 | -0.571874 |
| Li        | 1.029711  | 1.439466  | -0.167587 | Li        | 2.204773  | 0.186780  | 0.172865  |
| Li        | 0.278931  | -2.113343 | 0.165608  | Li        | -1.232964 | 1.519798  | 0.694532  |
| O         | 1.215175  | -1.415463 | 1.706139  | O         | -1.879162 | 1.909148  | -1.109395 |
| H         | 2.148510  | -1.179364 | 1.687468  | H         | -1.555714 | 1.015866  | -1.416147 |
| H         | 0.712902  | -0.564647 | 1.742616  | H         | -1.444391 | 2.548952  | -1.676118 |
| O         | 2.919382  | 1.695848  | -0.135060 | O         | 3.805552  | 1.151971  | 0.471052  |
| H         | 3.420174  | 1.760719  | 0.693730  | H         | 3.842759  | 2.048676  | 0.840143  |
| H         | 3.491581  | 1.143117  | -0.700725 | H         | 4.713666  | 0.954485  | 0.202972  |
| O         | 1.027548  | -1.769656 | -1.584389 | O         | -2.432198 | 0.275356  | 1.573158  |
| H         | 0.542677  | -0.915572 | -1.706428 | H         | -1.903755 | -0.553077 | 1.409059  |
| H         | 1.959086  | -1.575674 | -1.728473 | H         | -3.293672 | 0.112660  | 1.184878  |
| <b>3c</b> |           |           |           | <b>3d</b> |           |           |           |
|           | X         | Y         | Z         |           | X         | Y         | Z         |
| S         | 0.059925  | -0.536256 | 0.084293  | S         | -0.677457 | 0.868727  | 0.124800  |
| O         | -0.785456 | -1.050238 | -1.024053 | O         | 0.367732  | 1.755990  | 0.724308  |
| O         | -0.803746 | -0.340429 | 1.290546  | O         | 0.095117  | 0.089584  | -0.968172 |
| O         | 0.644632  | 0.825253  | -0.295802 | O         | -1.819980 | 1.579942  | -0.426935 |
| O         | 1.243288  | -1.386211 | 0.355983  | O         | -1.096164 | -0.210401 | 1.092408  |
| Li        | -2.276963 | 0.679274  | 0.810117  | Li        | 1.698105  | 0.955747  | -0.387581 |
| Li        | 2.423876  | 0.094319  | -0.075981 | Li        | -0.223748 | -1.593241 | -0.074648 |
| O         | -3.266200 | -0.410796 | -0.470212 | O         | 1.365792  | -2.574974 | 0.501406  |
| H         | -2.393808 | -0.740091 | -0.834773 | H         | 1.723277  | -2.336909 | 1.365769  |
| H         | -3.759519 | -1.198792 | -0.237879 | H         | 2.151486  | -2.607716 | -0.071223 |
| O         | 4.253820  | 0.573817  | -0.189980 | O         | 3.544243  | 0.435331  | -0.400648 |
| H         | 5.021702  | 0.005208  | -0.035513 | H         | 4.027462  | 0.365783  | 0.435894  |
| H         | 4.625677  | 1.425376  | -0.462000 | H         | 3.752632  | -0.409453 | -0.845198 |
| O         | -1.536587 | 2.268749  | 0.004251  | O         | -2.190653 | -2.034868 | -0.549154 |
| H         | -1.833339 | 2.594793  | -0.846897 | H         | -2.290407 | -1.365003 | 0.155960  |
| H         | -0.612885 | 1.919952  | -0.142030 | H         | -2.359684 | -1.541806 | -1.357381 |
| <b>3e</b> |           |           |           |           |           |           |           |
|           | X         | Y         | Z         |           |           |           |           |
| S         | 1.025411  | -0.034329 | -0.253614 |           |           |           |           |
| O         | -0.216415 | 0.598173  | -0.813986 |           |           |           |           |

|    |           |           |           |
|----|-----------|-----------|-----------|
| O  | 1.062673  | -1.448497 | -0.673517 |
| O  | 0.931507  | 0.070490  | 1.270724  |
| O  | 2.247048  | 0.734565  | -0.593804 |
| Li | -1.865368 | -0.087715 | -0.057571 |
| Li | 2.469648  | 1.249975  | 1.288464  |
| O  | -2.607546 | 1.611702  | -0.936979 |
| H  | -1.658822 | 1.695078  | -1.150535 |
| H  | -2.834190 | 2.392309  | -0.429039 |
| O  | -1.559390 | -2.028154 | -0.351929 |
| H  | -0.602123 | -1.990115 | -0.600949 |
| H  | -1.577864 | -2.512598 | 0.476470  |
| O  | -1.599629 | 0.001499  | 1.900718  |
| H  | -0.601543 | 0.007709  | 1.827726  |
| H  | -1.819261 | 0.709605  | 2.507696  |



|    | <b>4a</b> |           |           |    | <b>4b</b> |           |           |
|----|-----------|-----------|-----------|----|-----------|-----------|-----------|
|    | X         | Y         | Z         |    | X         | Y         | Z         |
| S  | -0.191040 | -1.231849 | -0.011690 | S  | -0.727002 | 0.124888  | -0.368098 |
| O  | 0.576198  | -1.538482 | 1.221216  | O  | -0.317050 | 1.597275  | -0.446737 |
| O  | 0.530662  | -1.680872 | -1.222741 | O  | 0.045431  | -0.513453 | -1.515996 |
| O  | -0.358210 | 0.298057  | -0.092323 | O  | -2.166467 | -0.019360 | -0.555774 |
| O  | -1.597489 | -1.730562 | 0.047841  | O  | -0.223729 | -0.437882 | 0.915654  |
| Li | -2.233015 | 0.093472  | -0.027219 | Li | 0.379815  | 1.222588  | -2.339419 |
| Li | 1.222701  | 1.333507  | -0.049941 | Li | 1.625992  | -0.270978 | 1.094654  |
| O  | 2.062899  | 0.626690  | 1.646079  | O  | 1.969849  | 1.625411  | 0.998541  |
| H  | 1.583084  | -0.244201 | 1.617743  | H  | 1.136815  | 1.854476  | 0.519486  |
| H  | 1.805219  | 1.037062  | 2.473030  | H  | 2.692661  | 1.942924  | 0.444499  |
| O  | -3.437075 | 1.560801  | 0.006209  | O  | 2.351523  | -1.339504 | -0.341923 |
| H  | -4.377120 | 1.709736  | 0.156382  | H  | 3.105472  | -1.016621 | -0.848999 |
| H  | -3.035890 | 2.452749  | 0.009236  | H  | 1.563293  | -1.232123 | -0.926071 |
| O  | 2.315435  | 0.337510  | -1.406490 | O  | -1.525380 | 1.837207  | -2.904221 |
| H  | 3.113408  | -0.019683 | -1.011372 | H  | -2.039116 | 1.027750  | -2.786841 |
| H  | 1.720466  | -0.444278 | -1.527805 | H  | -1.553533 | 2.219199  | -2.012552 |
| O  | 0.662134  | 3.240855  | -0.200389 | O  | 2.090398  | 1.812582  | -2.999931 |
| H  | 0.461424  | 3.544547  | -1.092291 | H  | 2.914053  | 1.403268  | -2.669792 |
| H  | -0.152092 | 3.429129  | 0.292568  | H  | 2.351729  | 2.717873  | -3.212384 |
|    | <b>4c</b> |           |           |    | <b>4d</b> |           |           |
|    | X         | Y         | Z         |    | X         | Y         | Z         |
| S  | -0.291217 | -0.913613 | -0.479983 | S  | -0.719793 | -0.915986 | -0.009519 |
| O  | 0.925623  | -1.729145 | -0.760715 | O  | -1.352139 | -0.364142 | -1.235102 |
| O  | 0.112332  | -0.084598 | 0.776269  | O  | -1.710668 | -1.605346 | 0.849262  |
| O  | -1.485673 | -1.709996 | -0.195524 | O  | -0.191606 | 0.294842  | 0.793261  |
| O  | -0.528936 | 0.119639  | -1.533621 | O  | 0.439729  | -1.783448 | -0.328959 |
| Li | 1.888355  | -0.808415 | 0.619006  | Li | 1.564479  | 0.839648  | 0.978092  |
| Li | -0.150600 | 1.594747  | -0.238396 | Li | -1.557713 | 1.568591  | 1.171286  |

|   |           |           |           |   |           |           |           |
|---|-----------|-----------|-----------|---|-----------|-----------|-----------|
| O | 1.526508  | 2.564431  | -0.533449 | O | -2.220997 | 2.059919  | -0.611472 |
| H | 2.054074  | 2.247642  | -1.276656 | H | -1.952475 | 1.196324  | -1.025659 |
| H | 2.177278  | 2.694514  | 0.176891  | H | -1.733957 | 2.750942  | -1.066077 |
| O | 3.640497  | -0.192884 | 1.070012  | O | 2.637656  | -0.574856 | 0.265120  |
| H | 4.313421  | -0.124472 | 0.375280  | H | 3.282014  | -0.580475 | -0.441884 |
| H | 3.693977  | 0.678048  | 1.511375  | H | 1.874415  | -1.164451 | -0.014876 |
| O | -2.119310 | 1.995435  | -0.110115 | O | -2.969995 | 0.455031  | 1.939493  |
| H | -2.238233 | 1.416527  | -0.874976 | H | -2.604323 | -0.426291 | 1.657074  |
| H | -2.424597 | 1.446894  | 0.642603  | H | -3.809729 | 0.542753  | 1.484471  |
| O | -2.470577 | 0.034456  | 1.846142  | O | 1.902641  | 2.647012  | 1.571552  |
| H | -1.499620 | 0.043290  | 1.899762  | H | 1.623069  | 2.945888  | 2.452348  |
| H | -2.594320 | -0.721673 | 1.251250  | H | 1.610658  | 3.375457  | 0.993669  |

**4e**

X Y Z

|    |           |           |           |
|----|-----------|-----------|-----------|
| S  | 0.966458  | -0.039510 | -0.094381 |
| O  | 0.133914  | -0.156431 | -1.336100 |
| O  | 0.503877  | 1.216496  | 0.651296  |
| O  | 2.388152  | -0.034096 | -0.362148 |
| O  | 0.541061  | -1.156592 | 0.854458  |
| Li | -1.775128 | -0.146134 | -1.170861 |
| Li | 0.018105  | 0.145036  | 2.163677  |
| O  | -1.967870 | 1.659446  | -0.285901 |
| H  | -2.563117 | 1.825605  | 0.452193  |
| H  | -1.048477 | 1.693162  | 0.084546  |
| O  | -2.030092 | -1.638896 | 0.058565  |
| H  | -1.101827 | -1.702458 | 0.384652  |
| H  | -2.588357 | -1.590706 | 0.841061  |
| O  | -1.240110 | 0.174994  | 3.591028  |
| H  | -1.992613 | 0.796578  | 3.559756  |
| H  | -1.627811 | -0.628469 | 3.973584  |
| O  | -1.743856 | 0.789975  | -3.012586 |
| H  | -0.791573 | 0.645837  | -2.884244 |
| H  | -1.911615 | 1.634400  | -2.578457 |

**4f**

X Y Z

|    |           |           |           |
|----|-----------|-----------|-----------|
| S  | 0.974338  | -0.086306 | -0.289823 |
| O  | -0.255116 | 0.612087  | -0.789742 |
| O  | 0.946326  | -1.488587 | -0.747601 |
| O  | 0.935446  | -0.022497 | 1.240256  |
| O  | 2.218284  | 0.637525  | -0.654078 |
| Li | -1.922499 | -0.089268 | -0.064939 |
| Li | 2.579554  | 0.987413  | 1.217701  |
| O  | -2.666997 | 1.583058  | -0.963423 |
| H  | -1.722914 | 1.694163  | -1.178695 |
| H  | -2.938234 | 2.382412  | -0.509971 |
| O  | -1.674223 | -2.009175 | -0.435890 |
| H  | -0.714716 | -1.990011 | -0.680374 |
| H  | -1.720058 | -2.559907 | 0.348467  |
| O  | -1.608442 | -0.040407 | 1.892153  |
| H  | -0.613104 | -0.051774 | 1.814295  |
| H  | -1.818713 | 0.638048  | 2.534625  |
| O  | 3.688865  | 1.908642  | 2.445746  |
| H  | 3.554863  | 1.962201  | 3.404202  |
| H  | 4.416309  | 2.519750  | 2.261493  |

Li<sub>2</sub>SO<sub>4</sub>(H<sub>2</sub>O)<sub>5</sub><sup>-</sup>

**5a**

X Y Z

|    |           |           |           |
|----|-----------|-----------|-----------|
| S  | 0.187153  | 1.372546  | -0.046965 |
| O  | 1.159369  | 1.595536  | 1.053771  |
| O  | -0.284280 | -0.092952 | 0.064465  |
| O  | 0.831410  | 1.521341  | -1.374587 |
| O  | -1.002913 | 2.247854  | 0.088107  |
| Li | 1.189225  | -1.369094 | 0.048761  |
| Li | -2.035371 | -0.699425 | 0.060508  |
| O  | 0.726068  | -3.280190 | 0.000925  |
| H  | -0.001149 | -3.672079 | 0.510705  |

**5b**

X Y Z

|    |           |           |           |
|----|-----------|-----------|-----------|
| S  | -0.218072 | 0.973470  | -0.255490 |
| O  | 0.967715  | 1.852686  | -0.075353 |
| O  | 0.076163  | -0.039886 | -1.345901 |
| O  | -1.448884 | 1.718494  | -0.527904 |
| O  | -0.380346 | 0.111801  | 1.000924  |
| Li | 2.546307  | 0.933678  | 0.301832  |
| Li | -0.407453 | -1.555383 | -0.120747 |
| O  | 2.822443  | -0.181175 | -1.250728 |
| H  | 3.104971  | -1.095258 | -1.120654 |

|    |           |           |           |    |           |           |           |
|----|-----------|-----------|-----------|----|-----------|-----------|-----------|
| H  | 0.664427  | -3.710867 | -0.860340 | H  | 1.882807  | -0.218348 | -1.537958 |
| O  | -3.153765 | 0.846669  | 0.204963  | O  | 2.185269  | 0.043842  | 1.973602  |
| H  | -3.856144 | 1.154153  | -0.366808 | H  | 1.207521  | 0.002455  | 1.874013  |
| H  | -2.413612 | 1.524098  | 0.176788  | H  | 2.487997  | -0.864400 | 2.100679  |
| O  | 2.261218  | -0.711514 | -1.491139 | O  | 0.723010  | -3.067897 | 0.219758  |
| H  | 1.786551  | 0.150385  | -1.629635 | H  | 0.564201  | -4.007346 | 0.071909  |
| H  | 3.141372  | -0.467564 | -1.197363 | H  | 1.668736  | -3.014267 | 0.468311  |
| O  | -2.718475 | -2.500563 | -0.118121 | O  | -2.294025 | -1.660120 | -0.777863 |
| H  | -2.393451 | -3.109076 | -0.803628 | H  | -2.808814 | -1.116195 | -0.143885 |
| H  | -2.847012 | -3.086244 | 0.646673  | H  | -2.112872 | -1.061249 | -1.512092 |
| O  | 2.296895  | -0.706932 | 1.588330  | O  | -3.195958 | 0.200308  | 1.076435  |
| H  | 2.083141  | -0.999593 | 2.475101  | H  | -2.329434 | 0.088714  | 1.500657  |
| H  | 1.955631  | 0.226720  | 1.512459  | H  | -2.993335 | 0.950745  | 0.493874  |
|    | <b>5c</b> |           |           |    | <b>5d</b> |           |           |
|    | X         | Y         | Z         |    | X         | Y         | Z         |
| S  | 0.468605  | -1.035386 | -0.075485 | S  | 0.625947  | -0.167446 | -0.712797 |
| O  | -0.527092 | -2.017707 | -0.556674 | O  | -0.609658 | 0.575773  | -0.272425 |
| O  | 0.515495  | -1.027013 | 1.431890  | O  | 0.237303  | -1.192475 | -1.697248 |
| O  | -0.004544 | 0.363928  | -0.477321 | O  | 1.224118  | -0.810983 | 0.534820  |
| O  | 1.818369  | -1.249776 | -0.638089 | O  | 1.676450  | 0.764444  | -1.195692 |
| Li | 1.278463  | 1.753761  | -0.180687 | Li | -1.953663 | -0.485695 | 0.634108  |
| Li | -1.855340 | 0.749399  | -0.085122 | Li | 2.831503  | 0.244889  | 0.276254  |
| O  | -2.771401 | -0.717970 | -1.110755 | O  | -1.985255 | 2.815239  | -0.228805 |
| H  | -2.001479 | -1.333949 | -1.005965 | H  | -1.304116 | 2.126141  | -0.409467 |
| H  | -2.876835 | -0.582070 | -2.053740 | H  | -1.526807 | 3.532337  | 0.211838  |
| O  | 2.809209  | 1.140683  | -1.275707 | O  | -2.100503 | -2.019142 | -0.629492 |
| H  | 2.580488  | 0.183512  | -1.167280 | H  | -1.318996 | -1.814069 | -1.198515 |
| H  | 2.747341  | 1.335584  | -2.213084 | H  | -1.889225 | -2.856871 | -0.211728 |
| O  | -2.004582 | -0.058776 | 1.751247  | O  | -0.871560 | -1.312210 | 2.092257  |
| H  | -2.594973 | -0.814742 | 1.715824  | H  | 0.007155  | -1.213711 | 1.641043  |
| H  | -1.101463 | -0.442156 | 1.853673  | H  | -0.769455 | -0.926198 | 2.963340  |
| O  | -2.153821 | 2.656186  | -0.454493 | O  | 4.476906  | 0.629087  | 1.125159  |
| H  | -2.106524 | 3.317839  | 0.247588  | H  | 4.807586  | 0.250001  | 1.953835  |
| H  | -1.620676 | 3.044091  | -1.169847 | H  | 5.123360  | 1.310494  | 0.888981  |
| O  | 1.927744  | 1.269826  | 1.630805  | O  | -3.424211 | 0.816615  | 0.871289  |
| H  | 2.865200  | 1.065235  | 1.616267  | H  | -3.025915 | 1.659735  | 0.552581  |
| H  | 1.466844  | 0.408307  | 1.774542  | H  | -4.227527 | 0.693398  | 0.362983  |
|    | <b>5e</b> |           |           |    | <b>5f</b> |           |           |
|    | X         | Y         | Z         |    | X         | Y         | Z         |
| S  | 0.234359  | 1.080724  | 0.320516  | S  | -0.532448 | -1.085762 | -0.059188 |
| O  | -0.993158 | 1.891768  | 0.076377  | O  | -0.426208 | -0.921624 | 1.440578  |
| O  | -0.039280 | 0.099383  | 1.438562  | O  | 0.306447  | -2.206742 | -0.520916 |
| O  | 1.424249  | 1.889626  | 0.561292  | O  | 0.017060  | 0.217729  | -0.644900 |
| O  | 0.444921  | 0.171882  | -0.903812 | O  | -1.950639 | -1.211494 | -0.459487 |
| Li | -2.458979 | 0.860273  | -0.436495 | Li | -1.086985 | 1.760265  | -0.326424 |

|    |           |           |           |    |           |           |           |
|----|-----------|-----------|-----------|----|-----------|-----------|-----------|
| Li | 0.373270  | -1.460619 | 0.311899  | Li | 1.886065  | 0.604623  | -0.330046 |
| O  | 3.200586  | 0.069867  | -0.819892 | O  | 1.873663  | 0.490104  | 1.707269  |
| H  | 2.319333  | 0.120050  | -1.235440 | H  | 1.073179  | -0.084345 | 1.781871  |
| H  | 3.122064  | 0.789708  | -0.176517 | H  | 1.649753  | 1.303331  | 2.166096  |
| O  | -1.947493 | 0.081577  | -2.126461 | O  | -1.542894 | 1.494386  | 1.594679  |
| H  | -0.984346 | 0.077218  | -1.902407 | H  | -2.490099 | 1.491057  | 1.746676  |
| H  | -2.159193 | -0.807602 | -2.428835 | H  | -1.231609 | 0.563924  | 1.729032  |
| O  | -2.711903 | -0.379507 | 1.029176  | O  | 2.748160  | -1.139994 | -0.727398 |
| H  | -2.613473 | -1.305071 | 0.764223  | H  | 3.232628  | -1.459819 | 0.036277  |
| H  | -1.854856 | -0.183567 | 1.467574  | H  | 1.921838  | -1.682902 | -0.757147 |
| O  | -1.146493 | -2.745771 | 0.137471  | O  | 2.229907  | 2.417470  | -1.026212 |
| H  | -1.171094 | -3.565338 | 0.656603  | H  | 1.814294  | 2.623174  | -1.877458 |
| H  | -1.389218 | -3.047194 | -0.763123 | H  | 2.008278  | 3.193105  | -0.485945 |
| O  | 2.190310  | -2.198781 | 0.270913  | O  | -2.798620 | 1.207685  | -1.155392 |
| H  | 2.380072  | -2.957341 | -0.284481 | H  | -2.639712 | 0.244077  | -0.982236 |
| H  | 2.742373  | -1.451732 | -0.059724 | H  | -2.871640 | 1.305770  | -2.106527 |

**Table S4.** Cartesian coordinates for stable isomers of  $\text{Li}_2\text{SO}_4(\text{H}_2\text{O})_n$  ( $n = 0-5$ ) clusters

| $\text{Li}_2\text{SO}_4$ |           |           |            |    |           |           |           |
|--------------------------|-----------|-----------|------------|----|-----------|-----------|-----------|
| <b>0a'</b>               |           |           | <b>0b'</b> |    |           |           |           |
|                          | X         | Y         | Z          |    | X         | Y         | Z         |
| S                        | -0.000013 | -0.280700 | 0.022145   | S  | 0.000010  | 0.000190  | -0.000118 |
| O                        | -1.246121 | -0.143776 | 0.844099   | O  | -0.921047 | 0.757703  | -0.908271 |
| O                        | 0.000072  | 1.083052  | -0.781971  | O  | -0.920453 | -0.757798 | 0.908157  |
| O                        | -0.000373 | -1.419372 | -0.861256  | O  | 0.920863  | 0.908052  | 0.757968  |
| O                        | 1.246377  | -0.144202 | 0.843727   | O  | 0.920631  | -0.908637 | -0.757317 |
| Li                       | -1.718503 | 1.351303  | -0.101289  | Li | -2.349765 | 0.000007  | 0.000346  |
| Li                       | 1.718664  | 1.351115  | -0.101301  | Li | 2.349737  | 0.000677  | -0.001031 |

  

| $\text{Li}_2\text{SO}_4(\text{H}_2\text{O})$ |           |           |            |    |           |           |           |
|----------------------------------------------|-----------|-----------|------------|----|-----------|-----------|-----------|
| <b>1a'</b>                                   |           |           | <b>1b'</b> |    |           |           |           |
|                                              | X         | Y         | Z          |    | X         | Y         | Z         |
| S                                            | -0.516251 | 0.074849  | 0.005318   | S  | 0.613009  | 0.000172  | 0.000066  |
| O                                            | 0.055194  | 1.174401  | -0.828122  | O  | -0.294850 | 1.188063  | 0.001796  |
| O                                            | 0.613501  | -0.382291 | 0.876016   | O  | -0.297266 | -1.185870 | -0.001692 |
| O                                            | -1.058152 | -1.047975 | -0.834576  | O  | 1.540460  | -0.002493 | 1.183507  |
| O                                            | -1.696977 | 0.530360  | 0.810691   | O  | 1.540245  | 0.000994  | -1.183565 |
| Li                                           | 1.745240  | 0.940423  | -0.037145  | Li | -1.765416 | 0.002645  | -0.000335 |
| Li                                           | -2.711540 | -0.755933 | -0.050110  | Li | 2.958009  | -0.002106 | -0.000191 |
| O                                            | 3.148517  | -0.386870 | 0.015956   | O  | -3.699279 | -0.000925 | -0.000012 |
| H                                            | 2.496260  | -1.016779 | 0.363916   | H  | -4.269850 | 0.771305  | 0.000385  |
| H                                            | 3.752118  | -0.858573 | -0.559465  | H  | -4.264890 | -0.776816 | 0.000641  |

  

| <b>1c'</b> |   |   | <b>1d'</b> |  |   |   |   |
|------------|---|---|------------|--|---|---|---|
|            | X | Y | Z          |  | X | Y | Z |

|    |           |           |           |    |           |           |           |
|----|-----------|-----------|-----------|----|-----------|-----------|-----------|
| S  | 0.497826  | -0.228167 | 0.075793  | S  | -0.618618 | 0.277236  | -0.009114 |
| O  | -0.192391 | -1.209267 | -0.764966 | O  | -1.666189 | -0.342227 | -0.878240 |
| O  | -0.091847 | -0.146847 | 1.437811  | O  | -0.256207 | -0.874157 | 0.967993  |
| O  | 0.254548  | 1.204077  | -0.502247 | O  | -1.043170 | 1.480553  | 0.676660  |
| O  | 1.984854  | -0.354332 | 0.055901  | O  | 0.667577  | 0.467196  | -0.782212 |
| Li | 2.089669  | 1.305041  | -0.758523 | Li | -1.391320 | -2.047634 | -0.044920 |
| Li | -1.297651 | 1.208299  | 0.701079  | Li | 1.464913  | -1.063925 | 0.250801  |
| O  | -2.593834 | 0.133058  | -0.284285 | O  | 3.114511  | 0.046537  | 0.010142  |
| H  | -1.944542 | -0.492843 | -0.673584 | H  | 3.743718  | -0.104110 | -0.697003 |
| H  | -3.287377 | -0.410031 | 0.095503  | H  | 2.410111  | 0.624475  | -0.357319 |

**1e'**

X Y Z

|    |           |           |           |
|----|-----------|-----------|-----------|
| S  | -0.568650 | 0.266930  | 0.014190  |
| O  | -1.952938 | -0.278833 | -0.161721 |
| O  | 0.268653  | -1.049395 | 0.268329  |
| O  | -0.426345 | 1.177489  | 1.129206  |
| O  | 0.010830  | 0.779119  | -1.262480 |
| Li | -1.359021 | -1.955079 | 0.275268  |
| Li | 1.498710  | -0.336893 | -1.123257 |
| O  | 2.836990  | -0.169436 | 0.274818  |
| H  | 3.217487  | 0.646101  | 0.609024  |
| H  | 2.150085  | -0.442277 | 0.905751  |

**1f'**

X Y Z

|    |           |           |           |
|----|-----------|-----------|-----------|
| S  | -0.693550 | -0.000037 | 0.071823  |
| O  | -0.102759 | 1.224129  | 0.730477  |
| O  | 0.031895  | 0.000135  | -1.313877 |
| O  | -2.124662 | -0.001002 | -0.037539 |
| O  | -0.101231 | -1.223364 | 0.730859  |
| Li | 1.067343  | 1.440308  | -0.697265 |
| Li | 1.067893  | -1.439669 | -0.697781 |
| O  | 2.424148  | -0.000049 | 0.255926  |
| H  | 1.801945  | -0.001226 | 1.008082  |
| H  | 3.313810  | 0.000344  | 0.618813  |

Li<sub>2</sub>SO<sub>4</sub>(H<sub>2</sub>O)<sub>2</sub>

**2a'**

X Y Z

|    |           |           |           |
|----|-----------|-----------|-----------|
| S  | -0.156874 | -0.349766 | -0.004387 |
| O  | -1.171055 | -0.033586 | 1.074611  |
| O  | -0.967569 | -1.036466 | -1.068125 |
| O  | 0.950608  | -1.199027 | 0.504857  |
| O  | 0.478753  | 0.901225  | -0.514326 |
| Li | -2.530731 | -0.713242 | -0.120372 |
| Li | 2.213275  | 0.192165  | -0.004761 |
| O  | -3.349597 | 1.079147  | 0.062447  |
| H  | -2.541701 | 1.181416  | 0.607929  |
| H  | -3.273740 | 1.722598  | -0.645627 |
| O  | 4.060306  | 0.628836  | -0.000073 |
| H  | 4.473186  | 1.440018  | -0.328425 |
| H  | 4.793041  | 0.094416  | 0.336569  |

**2b'**

X Y Z

|    |           |           |           |
|----|-----------|-----------|-----------|
| S  | 0.776948  | 0.110970  | -0.236558 |
| O  | 0.541636  | 1.563195  | -0.403446 |
| O  | 0.076017  | -0.663372 | -1.295059 |
| O  | 0.169209  | -0.319807 | 1.119571  |
| O  | 2.210586  | -0.248554 | -0.103129 |
| Li | 1.876779  | -1.003744 | 1.676037  |
| Li | -1.673921 | -0.212235 | 1.042171  |
| O  | -2.014621 | 1.567749  | 0.327889  |
| H  | -1.080240 | 1.781531  | 0.055984  |
| H  | -2.532150 | 1.627296  | -0.477317 |
| O  | -2.180809 | -1.562353 | -0.283715 |
| H  | -1.372566 | -1.324086 | -0.820183 |
| H  | -2.062192 | -2.486241 | -0.053076 |

**2c'**

X Y Z

|   |           |           |           |
|---|-----------|-----------|-----------|
| S | -0.816765 | -0.543155 | -0.008344 |
| O | -1.403765 | 0.567939  | -0.810389 |
| O | -1.793568 | -1.229095 | 0.818917  |

**2d'**

X Y Z

|   |           |           |           |
|---|-----------|-----------|-----------|
| S | 0.821509  | -0.051272 | -0.007969 |
| O | -0.456261 | 0.646982  | 0.354638  |
| O | 0.514368  | -1.445673 | -0.388196 |

|    |           |           |           |    |           |           |           |
|----|-----------|-----------|-----------|----|-----------|-----------|-----------|
| O  | 0.303594  | 0.084833  | 0.873356  | O  | 1.795913  | 0.016924  | 1.136210  |
| O  | -0.026311 | -1.478154 | -0.887160 | O  | 1.514868  | 0.696546  | -1.116620 |
| Li | 1.569896  | -0.994677 | -0.042973 | Li | -2.163477 | -0.072168 | 0.355327  |
| Li | 0.870802  | 1.822289  | 0.921487  | Li | 2.953179  | 0.920110  | 0.021983  |
| O  | -0.337351 | 2.822624  | -0.166921 | O  | -2.802939 | 1.731059  | -0.026006 |
| H  | -0.859265 | 2.025230  | -0.493674 | H  | -1.874829 | 2.001203  | -0.117878 |
| H  | -0.035714 | 3.302714  | -0.938763 | H  | -3.331227 | 2.235530  | -0.645405 |
| O  | 3.416722  | -0.400618 | -0.085006 | O  | -2.012476 | -1.886583 | -0.043751 |
| H  | 3.527045  | 0.323967  | 0.565067  | H  | -1.027488 | -1.919000 | -0.214166 |
| H  | 3.759319  | -0.015334 | -0.901746 | H  | -2.367974 | -2.773343 | -0.067620 |

**2e'**

|    | X         | Y         | Z         |
|----|-----------|-----------|-----------|
| S  | 0.823404  | -0.225615 | -0.022930 |
| O  | 0.075166  | -0.582741 | -1.256206 |
| O  | 0.252586  | -1.056083 | 1.066822  |
| O  | 0.642641  | 1.263772  | 0.283720  |
| O  | 2.306188  | -0.359295 | -0.156515 |
| Li | -1.186729 | -1.557388 | -0.142248 |
| Li | 2.488446  | 1.439928  | 0.231424  |
| O  | -2.886432 | -0.743932 | 0.093639  |
| H  | -2.672707 | 0.224458  | 0.051327  |
| H  | -3.525168 | -0.858185 | 0.798648  |
| O  | -2.019095 | 1.776915  | -0.030936 |
| H  | -1.055290 | 1.709062  | 0.157073  |
| H  | -2.077734 | 2.160167  | -0.908750 |

**2f'**

|    | X         | Y         | Z         |
|----|-----------|-----------|-----------|
| S  | 0.036623  | 0.591465  | -0.091329 |
| O  | -1.205512 | 1.397326  | -0.096642 |
| O  | -0.032953 | -0.246584 | 1.205583  |
| O  | 1.286965  | 1.340724  | -0.164159 |
| O  | -0.014253 | -0.502358 | -1.145619 |
| Li | -1.954220 | 0.080735  | 1.120030  |
| Li | 0.932050  | -1.611375 | 0.200154  |
| O  | -2.487993 | -1.290201 | -0.200752 |
| H  | -1.717563 | -1.136299 | -0.794845 |
| H  | -3.267999 | -1.293027 | -0.759074 |
| O  | 2.765814  | -0.982536 | 0.132064  |
| H  | 3.434008  | -1.151525 | -0.534678 |
| H  | 2.552854  | -0.025691 | 0.072973  |

Li<sub>2</sub>SO<sub>4</sub>(H<sub>2</sub>O)<sub>3</sub>

**3a'**

|    | X         | Y         | Z         |
|----|-----------|-----------|-----------|
| S  | 0.192850  | -0.414525 | -0.088977 |
| O  | -0.731397 | -1.229953 | -0.898011 |
| O  | -0.411308 | -0.127806 | 1.243226  |
| O  | 0.460427  | 0.929229  | -0.780281 |
| O  | 1.550775  | -1.024803 | 0.032689  |
| Li | -2.136922 | 0.561376  | 1.047444  |
| Li | 2.304330  | 0.568751  | -0.797271 |
| O  | -3.154802 | -0.803412 | 0.120505  |
| H  | -2.365241 | -1.126807 | -0.383783 |
| H  | -3.621357 | -1.579015 | 0.434421  |
| O  | 3.791525  | 0.378838  | 0.416421  |
| H  | 3.310045  | -0.334996 | 0.864814  |
| H  | 4.340163  | 0.831194  | 1.058160  |
| O  | -1.856390 | 2.089184  | -0.107164 |
| H  | -2.415890 | 2.265468  | -0.865738 |
| H  | -0.957743 | 1.873940  | -0.461381 |

**3c'**

**3b'**

|    | X         | Y         | Z         |
|----|-----------|-----------|-----------|
| S  | -0.216669 | -0.278662 | 0.220547  |
| O  | 0.815599  | -0.172390 | 1.284424  |
| O  | 0.213334  | -1.242499 | -0.811121 |
| O  | -0.398780 | 1.117721  | -0.395045 |
| O  | -1.569451 | -0.596104 | 0.770295  |
| Li | -2.233315 | 1.069411  | 0.020513  |
| Li | 2.499435  | 0.267911  | 0.618832  |
| O  | 2.871601  | -1.224147 | -0.538845 |
| H  | 1.929026  | -1.443215 | -0.749502 |
| H  | 3.397302  | -1.425508 | -1.312777 |
| O  | -3.821074 | 0.088137  | -0.484075 |
| H  | -3.372775 | -0.721835 | -0.189411 |
| H  | -4.375500 | -0.126483 | -1.235284 |
| O  | 2.128966  | 1.968936  | -0.238194 |
| H  | 2.478458  | 2.348474  | -1.045136 |
| H  | 1.152404  | 1.856754  | -0.367663 |

**3d'**

|    | X          | Y         | Z         |    | X          | Y         | Z         |
|----|------------|-----------|-----------|----|------------|-----------|-----------|
| S  | 0.124683   | -0.420283 | 0.048740  | S  | 0.180105   | 0.003743  | -0.602082 |
| O  | -0.688355  | -1.010824 | -1.034755 | O  | 1.662287   | 0.003545  | -0.777314 |
| O  | -0.708857  | -0.262800 | 1.274085  | O  | 0.011457   | -0.004715 | 0.947758  |
| O  | 0.617715   | 0.975338  | -0.364995 | O  | -0.453912  | -1.220898 | -1.122817 |
| O  | 1.383365   | -1.174980 | 0.309956  | O  | -0.452113  | 1.235048  | -1.109301 |
| Li | -2.299384  | 0.625501  | 0.876810  | Li | 1.889166   | -0.007615 | 1.123405  |
| Li | 2.383820   | 0.350035  | -0.155383 | Li | -1.823491  | -0.007342 | 1.361101  |
| O  | -3.216639  | -0.488582 | -0.421046 | O  | -2.424883  | 1.660573  | 0.614119  |
| H  | -2.361723  | -0.809045 | -0.811997 | H  | -3.251308  | 1.963214  | 0.236693  |
| H  | -3.770278  | -1.260964 | -0.299623 | H  | -1.738524  | 1.715698  | -0.100675 |
| O  | 4.307520   | 0.485682  | -0.187595 | O  | 3.788960   | -0.005869 | 0.880707  |
| H  | 4.831919   | -0.281974 | 0.055879  | H  | 3.729276   | 0.001076  | -0.084768 |
| H  | 4.916341   | 1.187501  | -0.426855 | H  | 4.710532   | 0.004143  | 1.139354  |
| O  | -1.688988  | 2.257189  | 0.031718  | O  | -2.423631  | -1.668842 | 0.599138  |
| H  | -2.071910  | 2.558054  | -0.794357 | H  | -3.250921  | -1.964943 | 0.218372  |
| H  | -0.754811  | 1.994079  | -0.170512 | H  | -1.738245  | -1.715436 | -0.117069 |
|    | <b>3e'</b> |           |           |    | <b>3f'</b> |           |           |
|    | X          | Y         | Z         |    | X          | Y         | Z         |
| S  | -0.202066  | -0.433531 | -0.452170 | S  | 0.340640   | -0.016358 | 0.569624  |
| O  | -1.642462  | -0.832271 | -0.442480 | O  | -0.909610  | -0.031076 | 1.359999  |
| O  | 0.708493   | -1.587998 | -0.522730 | O  | 0.342311   | -1.191084 | -0.407919 |
| O  | -0.012734  | 0.233738  | 0.942424  | O  | 1.563949   | -0.012141 | 1.370319  |
| O  | 0.086931   | 0.590880  | -1.474784 | O  | 0.332265   | 1.180269  | -0.382047 |
| Li | 1.777892   | 0.791920  | 1.115546  | Li | -2.448418  | 0.003751  | 0.292188  |
| Li | -1.854334  | -0.010523 | 1.287391  | Li | 1.290459   | 0.033596  | -1.627640 |
| O  | -3.540693  | 0.683407  | 0.656419  | O  | 3.107137   | 0.065154  | -0.933532 |
| H  | -3.318669  | 0.344047  | -0.226203 | H  | 2.851166   | 0.122581  | 0.013805  |
| H  | -4.074527  | 1.472446  | 0.556507  | H  | 3.771381   | -0.624384 | -0.987038 |
| O  | 1.944459   | 2.083305  | -0.303674 | O  | -2.266926  | 1.688533  | -0.648343 |
| H  | 2.673446   | 2.354787  | -0.862395 | H  | -1.276841  | 1.724103  | -0.620792 |
| H  | 1.251209   | 1.692652  | -0.896815 | H  | -2.591230  | 2.571793  | -0.469037 |
| O  | 2.751952   | -0.861827 | 1.011862  | O  | -2.270622  | -1.655019 | -0.704140 |
| H  | 2.091229   | -1.347113 | 0.454086  | H  | -2.607260  | -2.539482 | -0.556250 |
| H  | 3.622916   | -1.111045 | 0.701462  | H  | -1.281648  | -1.704085 | -0.668611 |
|    | <b>4a'</b> |           |           |    | <b>4b'</b> |           |           |
|    | X          | Y         | Z         |    | X          | Y         | Z         |
| S  | 0.000008   | -0.000111 | -0.501052 | S  | 0.023141   | 0.200586  | 0.592595  |
| O  | 0.000150   | 1.229561  | 0.378668  | O  | 1.196573   | 0.463237  | 1.440110  |
| O  | -0.000323  | -1.229830 | 0.378556  | O  | 0.338708   | 0.664185  | -0.829943 |
| O  | 1.235485   | -0.000291 | -1.318197 | O  | -1.200508  | 0.899738  | 1.048069  |
| O  | -1.235346  | 0.000161  | -1.318515 | O  | -0.261781  | -1.279273 | 0.505785  |
| Li | 2.812422   | -0.000153 | -0.327442 | Li | 2.043574   | 0.009206  | -1.286089 |
| Li | -2.811704  | 0.000444  | -0.327034 | Li | -2.730916  | 0.578780  | 0.043453  |

Li<sub>2</sub>SO<sub>4</sub>(H<sub>2</sub>O)<sub>4</sub>

|    |            |           |           |    |            |           |           |
|----|------------|-----------|-----------|----|------------|-----------|-----------|
| O  | -2.622507  | 1.650149  | 0.657004  | O  | 3.341476   | 0.767831  | -0.079094 |
| H  | -2.911415  | 1.977235  | 1.508907  | H  | 2.692816   | 0.751586  | 0.669017  |
| H  | -1.632682  | 1.701456  | 0.636141  | H  | 3.799162   | 1.608300  | -0.039406 |
| O  | 2.622579   | -1.649749 | 0.657336  | O  | 1.835038   | -1.895414 | -1.039224 |
| H  | 2.911211   | -1.977248 | 1.509192  | H  | 1.025448   | -1.904518 | -0.468991 |
| H  | 1.632856   | -1.701382 | 0.636164  | H  | 2.491281   | -2.433873 | -0.592929 |
| O  | -2.623180  | -1.649755 | 0.656644  | O  | -2.149167  | 1.257469  | -1.673997 |
| H  | -1.633395  | -1.701503 | 0.635598  | H  | -1.174331  | 1.159688  | -1.535744 |
| H  | -2.911973  | -1.976213 | 1.508833  | H  | -2.338041  | 0.994333  | -2.575140 |
| O  | 2.622838   | 1.649690  | 0.656630  | O  | -2.921486  | -1.320588 | 0.259247  |
| H  | 1.633093   | 1.701256  | 0.635671  | H  | -3.318225  | -2.078346 | -0.169697 |
| H  | 2.911863   | 1.978930  | 1.507672  | H  | -1.965801  | -1.526020 | 0.421219  |
|    | <b>4e'</b> |           |           |    | <b>4d'</b> |           |           |
|    | X          | Y         | Z         |    | X          | Y         | Z         |
| S  | 0.105370   | -0.179226 | 0.629467  | S  | -0.064506  | -0.356379 | -0.391556 |
| O  | 0.113171   | 1.148323  | -0.073567 | O  | -0.869863  | 0.165398  | -1.515019 |
| O  | 1.400131   | -0.356973 | 1.328085  | O  | -0.885177  | -1.275159 | 0.447751  |
| O  | -0.064735  | -1.285719 | -0.402882 | O  | 0.385392   | 0.809834  | 0.499856  |
| O  | -1.081424  | -0.299790 | 1.511198  | O  | 1.202587   | -0.998251 | -0.837776 |
| Li | 2.867077   | -0.149525 | 0.185009  | Li | -2.499028  | -0.490177 | 0.958808  |
| Li | -1.881648  | -1.520073 | 0.244990  | Li | 2.305763   | 0.305490  | 0.196349  |
| O  | 2.703975   | 1.669342  | -0.465721 | O  | -1.879034  | 1.072227  | 1.913231  |
| H  | 1.716201   | 1.687581  | -0.395966 | H  | -2.263879  | 1.946804  | 1.836486  |
| H  | 3.025214   | 2.505884  | -0.126958 | H  | -0.961320  | 1.128848  | 1.546643  |
| O  | -3.358793  | -0.766720 | -0.675878 | O  | 3.165151   | -1.290560 | 0.954200  |
| H  | -3.135303  | 0.202034  | -0.699915 | H  | 2.509479   | -1.821360 | 0.472672  |
| H  | -3.787305  | -0.979265 | -1.505607 | H  | 3.286773   | -1.681363 | 1.820550  |
| O  | -2.486817  | 1.745565  | -0.640872 | O  | 2.478556   | 2.116798  | -0.569900 |
| H  | -1.517774  | 1.634408  | -0.505613 | H  | 2.669789   | 2.352367  | -1.479773 |
| H  | -2.788059  | 2.243828  | 0.122245  | H  | 1.514500   | 2.165018  | -0.453660 |
| O  | 2.489810   | -1.428540 | -1.210902 | O  | -3.396870  | -0.037706 | -0.696554 |
| H  | 1.523966   | -1.574965 | -1.059294 | H  | -3.994970  | -0.521207 | -1.267575 |
| H  | 2.598299   | -1.246999 | -2.146044 | H  | -2.554487  | 0.093751  | -1.202657 |
|    | <b>4e'</b> |           |           |    | <b>4f'</b> |           |           |
|    | X          | Y         | Z         |    | X          | Y         | Z         |
| S  | -0.099565  | -0.223717 | 0.161641  | S  | 0.707515   | 0.339389  | -1.009428 |
| O  | -0.661855  | -1.511636 | -0.309665 | O  | 1.456908   | -0.518748 | -1.935321 |
| O  | 1.431285   | -0.409719 | 0.121158  | O  | 1.695104   | 0.961564  | 0.001453  |
| O  | -0.434961  | -0.016609 | 1.610414  | O  | -0.284859  | -0.448963 | -0.206781 |
| O  | -0.459636  | 0.937497  | -0.663188 | O  | 0.051685   | 1.510475  | -1.642624 |
| Li | 1.216527   | -2.350368 | 0.337195  | Li | 2.711448   | -0.396629 | 0.819892  |
| Li | 2.266742   | 1.230695  | 0.522020  | Li | 0.801723   | 2.668749  | -0.313926 |
| O  | 0.882465   | -3.463767 | -1.235367 | O  | -2.185480  | 1.305241  | 0.677318  |
| H  | 0.112248   | -2.886257 | -1.388905 | H  | -2.829387  | 1.373711  | -0.031403 |
| H  | 1.312707   | -3.614620 | -2.077964 | H  | -1.573319  | 0.587937  | 0.394494  |

|   |          |           |           |   |           |           |           |
|---|----------|-----------|-----------|---|-----------|-----------|-----------|
| O | 1.763073 | 2.379427  | -0.940009 | O | 3.694219  | -1.164886 | -0.639724 |
| H | 1.666043 | 3.322561  | -1.073733 | H | 3.001667  | -0.996661 | -1.325015 |
| H | 0.870125 | 1.970358  | -1.052408 | H | 4.098392  | -2.009606 | -0.839304 |
| O | 0.716460 | -2.465277 | 2.240160  | O | -0.523968 | 3.366992  | 0.841495  |
| H | 0.230854 | -1.613383 | 2.297255  | H | -0.537850 | 3.772152  | 1.708857  |
| H | 0.110068 | -3.136774 | 2.559100  | H | -1.228269 | 2.663584  | 0.829210  |
| O | 1.549612 | 1.636268  | 2.264632  | O | 1.336964  | -1.454534 | 1.664357  |
| H | 0.731724 | 1.076426  | 2.228487  | H | 1.256974  | -2.392234 | 1.843062  |
| H | 1.307765 | 2.464934  | 2.679883  | H | 0.574900  | -1.201297 | 1.084911  |

Li<sub>2</sub>SO<sub>4</sub>(H<sub>2</sub>O)<sub>5</sub>

| <b>5a'</b> |           |           |           | <b>5b'</b> |           |           |           |
|------------|-----------|-----------|-----------|------------|-----------|-----------|-----------|
|            | X         | Y         | Z         |            | X         | Y         | Z         |
| S          | 0.280756  | -0.055660 | -0.380583 | S          | 0.295819  | 0.084828  | 0.423761  |
| O          | 0.400721  | 1.264131  | 0.342846  | O          | 1.464907  | -0.007025 | 1.333271  |
| O          | 0.459515  | -1.175148 | 0.614118  | O          | 0.228404  | -1.179008 | -0.392733 |
| O          | 1.356739  | -0.143728 | -1.397789 | O          | 0.503172  | 1.263511  | -0.500068 |
| O          | -1.075928 | -0.149896 | -0.972345 | O          | -0.978304 | 0.266248  | 1.156407  |
| Li         | 3.076256  | -0.052247 | -0.682899 | Li         | 3.097444  | -0.216009 | 0.461525  |
| Li         | -2.567190 | 0.059771  | 0.289914  | Li         | -2.523064 | 1.016181  | 0.468143  |
| O          | -2.133623 | 1.838620  | 1.031951  | O          | 3.167609  | 1.391613  | -0.603351 |
| H          | -2.448295 | 2.654404  | 0.638976  | H          | 2.189604  | 1.541892  | -0.659904 |
| H          | -1.161125 | 1.803236  | 0.858457  | H          | 3.544153  | 1.622840  | -1.452579 |
| O          | 3.087879  | -1.612678 | 0.452137  | O          | -3.775073 | -0.309909 | -0.072054 |
| H          | 3.524834  | -1.870092 | 1.264013  | H          | -3.249233 | -1.137233 | -0.241126 |
| H          | 2.110498  | -1.654317 | 0.612429  | H          | -4.527932 | -0.324441 | -0.663062 |
| O          | -2.030867 | -1.264088 | 1.636241  | O          | -2.176181 | -2.360949 | -0.562431 |
| H          | -1.090805 | -1.416131 | 1.375890  | H          | -1.276774 | -1.951148 | -0.563927 |
| H          | -2.018330 | -1.039558 | 2.568299  | H          | -2.134843 | -3.058636 | 0.094629  |
| O          | 3.032975  | 1.678239  | 0.172615  | O          | 2.805770  | -1.868997 | -0.495871 |
| H          | 2.051795  | 1.737036  | 0.302469  | H          | 3.112028  | -2.227785 | -1.328970 |
| H          | 3.447825  | 2.051196  | 0.950717  | H          | 1.817451  | -1.810379 | -0.542998 |
| O          | -3.709301 | -0.367471 | -1.283290 | O          | -1.860233 | 2.435270  | -0.642360 |
| H          | -2.899112 | -0.490202 | -1.800246 | H          | -0.910042 | 2.152979  | -0.695474 |
| H          | -4.256721 | -1.141076 | -1.428324 | H          | -2.108769 | 2.790624  | -1.495544 |
| <b>5c'</b> |           |           |           | <b>5d'</b> |           |           |           |
|            | X         | Y         | Z         |            | X         | Y         | Z         |
| S          | -0.295699 | -0.356219 | -0.399686 | S          | 0.283685  | 0.385611  | 0.375067  |
| O          | -0.703259 | -0.184472 | 1.059442  | O          | 1.269379  | 1.286902  | 0.995553  |
| O          | 1.077969  | -0.914874 | -0.439315 | O          | 0.702811  | 0.120405  | -1.066538 |
| O          | -0.277146 | 1.024748  | -1.003763 | O          | -1.090145 | 0.945190  | 0.368107  |
| O          | -1.286906 | -1.216550 | -1.067913 | O          | 0.259681  | -0.954369 | 1.065623  |
| Li         | -2.534189 | 0.247067  | 1.119689  | Li         | 2.530375  | -0.322134 | -1.093679 |
| Li         | 2.510788  | 0.176528  | 0.306123  | Li         | -2.517343 | -0.206435 | -0.301301 |
| O          | 1.720049  | 0.516586  | 2.079638  | O          | 3.524147  | 1.170391  | -0.385942 |
| H          | 0.789071  | 0.239975  | 1.914636  | H          | 2.792549  | 1.405750  | 0.239477  |

|    |            |           |           |    |            |           |           |
|----|------------|-----------|-----------|----|------------|-----------|-----------|
| H  | 1.677701   | 1.415736  | 2.410677  | H  | 3.847533   | 1.988348  | -0.765017 |
| O  | -3.519587  | -1.226454 | 0.358110  | O  | 2.575709   | -1.865028 | 0.067758  |
| H  | -3.810475  | -2.069702 | 0.707024  | H  | 1.721816   | -1.738388 | 0.552338  |
| H  | -2.796025  | -1.412877 | -0.292117 | H  | 3.249947   | -2.019734 | 0.731705  |
| O  | 3.683226   | -1.360488 | -0.167711 | O  | -1.707620  | -0.702239 | -2.027266 |
| H  | 2.897142   | -1.829152 | -0.485412 | H  | -0.780762  | -0.399873 | -1.886606 |
| H  | 4.167576   | -1.966463 | 0.395385  | H  | -1.653457  | -1.629237 | -2.267385 |
| O  | -2.606580  | 1.842716  | 0.038263  | O  | -2.291195  | -1.772724 | 0.871283  |
| H  | -3.283747  | 2.019283  | -0.617192 | H  | -2.734519  | -1.883958 | 1.713762  |
| H  | -1.750457  | 1.757745  | -0.451643 | H  | -1.335415  | -1.623833 | 1.073257  |
| O  | 2.271788   | 1.836749  | -0.727284 | O  | -3.691105  | 1.365930  | 0.029015  |
| H  | 2.716580   | 2.028917  | -1.554260 | H  | -2.907997  | 1.860915  | 0.312266  |
| H  | 1.317590   | 1.701586  | -0.945281 | H  | -4.174555  | 1.922845  | -0.583307 |
|    | <b>Se'</b> |           |           |    | <b>5f'</b> |           |           |
|    | X          | Y         | Z         |    | X          | Y         | Z         |
| S  | -0.300720  | -0.232913 | -0.591515 | S  | -0.236184  | -0.111766 | -0.486807 |
| O  | -0.302336  | -1.508648 | 0.218707  | O  | 1.033822   | -0.266584 | -1.239516 |
| O  | -0.578512  | 0.900718  | 0.385636  | O  | -0.603042  | 1.335974  | -0.357667 |
| O  | -1.371574  | -0.246693 | -1.601419 | O  | 0.029752   | -0.690913 | 0.891867  |
| O  | 1.044102   | -0.039574 | -1.180846 | O  | -1.375564  | -0.841711 | -1.099358 |
| Li | -2.319979  | 0.773617  | 1.084771  | Li | -2.972109  | -0.670415 | -0.148852 |
| Li | 2.658202   | -0.589511 | -0.468285 | Li | 1.971479   | -0.818951 | 0.541924  |
| O  | 2.223260   | -2.299599 | 0.271171  | O  | 2.484432   | -2.423334 | -0.515188 |
| H  | 1.236672   | -2.200283 | 0.304445  | H  | 1.970471   | -2.021277 | -1.235885 |
| H  | 2.491035   | -2.855173 | 1.002642  | H  | 2.195366   | -3.333904 | -0.436440 |
| O  | 3.535045   | 0.889792  | 0.341862  | O  | -3.274684  | 1.228262  | -0.246391 |
| H  | 2.839257   | 1.583478  | 0.492485  | H  | -2.327194  | 1.496851  | -0.342102 |
| H  | 4.208634   | 1.007405  | 1.011684  | H  | -3.714899  | 1.900121  | 0.274379  |
| O  | -2.282361  | -0.971665 | 1.912645  | O  | 1.669837   | 2.746026  | 0.124469  |
| H  | -1.530436  | -1.355011 | 1.390426  | H  | 1.985076   | 3.005946  | -0.743922 |
| H  | -2.960806  | -1.645934 | 1.964215  | H  | 0.786924   | 2.341487  | -0.034687 |
| O  | 1.515315   | 2.571167  | 0.721978  | O  | 3.006402   | 0.674294  | 1.163334  |
| H  | 1.404453   | 3.240193  | 0.043205  | H  | 2.585673   | 1.498189  | 0.808245  |
| H  | 0.725855   | 1.984773  | 0.639222  | H  | 3.387986   | 0.895587  | 2.013010  |
| O  | -3.415488  | 1.017763  | -0.472098 | O  | -2.457003  | -1.399776 | 1.570538  |
| H  | -4.293845  | 0.770529  | -0.761436 | H  | -1.479823  | -1.246508 | 1.506107  |
| H  | -2.767078  | 0.605550  | -1.098358 | H  | -2.720359  | -1.178043 | 2.464289  |
